# Supplementary material
Source: ML conference proceedings conference paper supplement (https://proceedings.neurips.cc/paper_files/paper/2018/hash/f2925f97bc13ad2852a7a551802feea0-Abstract.html)
Supplement: Supplementary file [file f2925f97bc13ad2852a7a551802feea0-Supplemental.zip]

## Appendix

**Lemma 1.**  $\lim_{q \rightarrow 0} \mathcal{L}_q(f(\mathbf{x}), \mathbf{e}_j) = \mathcal{L}_C(f(\mathbf{x}), \mathbf{e}_j)$ , where  $\mathcal{L}_q$  represents the  $\mathcal{L}_q$  loss, and  $\mathcal{L}_C$  represents the categorical cross entropy loss.

*Proof.* from equation [6](#), and using L'Hôpital's rule,

$$\begin{aligned} \lim_{q \rightarrow 0} \mathcal{L}_q(f(\mathbf{x}), \mathbf{e}_j) &= \lim_{q \rightarrow 0} \frac{(1 - f_j(\mathbf{x})^q)}{q} = \lim_{q \rightarrow 0} \frac{\frac{d}{dq}(1 - f_j(\mathbf{x})^q)}{\frac{d}{dq}q} \\ &= \lim_{q \rightarrow 0} -f_j(\mathbf{x})^q \log(f_j(\mathbf{x})) = -\log(f_j(\mathbf{x})) = \mathcal{L}_C(f(\mathbf{x}), \mathbf{e}_j). \end{aligned}$$

□

**Lemma 2.** For any  $\mathbf{x}$  and  $q \in (0, 1]$ , the sum of  $\mathcal{L}_q$  loss with respect to all classes is bounded by:

$$\frac{c - c^{(1-q)}}{q} \leq \sum_{j=1}^c \frac{(1 - f_j(\mathbf{x})^q)}{q} \leq \frac{c - 1}{q}. \quad (14)$$

*Proof.* Observe that, since we have a softmax layer at the end,  $f_j(\mathbf{x}) \leq 1$  for all  $j$ , and  $\sum_{j=1}^c f_j(\mathbf{x}) = 1$ . Now, since  $q \in (0, 1]$ , we have  $f_j(\mathbf{x}) \leq f_j(\mathbf{x})^q$ , and  $(1 - f_j(\mathbf{x})) \geq (1 - f_j(\mathbf{x})^q)$ . Hence,

$$\sum_{j=1}^c \frac{(1 - f_j(\mathbf{x})^q)}{q} \leq \sum_{j=1}^c \frac{(1 - f_j(\mathbf{x}))}{q} = \frac{c - \sum_{j=1}^c f_j(\mathbf{x})}{q} = \frac{c - 1}{q}.$$

Moreover, since  $\sum_{j=1}^c f_j(\mathbf{x})^q \leq \sum_{j=1}^c (1/c)^q$  for all  $\mathbf{x}$  and  $q \in (0, 1]$ ,  $\sum_{j=1}^c (1 - f_j(\mathbf{x})^q) \geq \sum_{j=1}^c (1 - (1/c)^q)$ , and

$$\sum_{j=1}^c \frac{(1 - f_j(\mathbf{x})^q)}{q} \geq \sum_{j=1}^c \frac{(1 - (1/c)^q)}{q} = \frac{c - c^{(1-q)}}{q}.$$

□

**Theorem 1.** Under uniform noise with  $\eta \leq 1 - \frac{1}{c}$ ,

$$0 \leq (R_{\mathcal{L}_q}^\eta(f^*) - R_{\mathcal{L}_q}^\eta(\hat{f})) \leq A, \quad (15)$$

and

$$A' \leq R_{\mathcal{L}_q}(f^*) - R_{\mathcal{L}_q}(\hat{f}) \leq 0, \quad (16)$$

where  $A = \frac{\eta[c^{(1-q)} - 1]}{q(c-1)} \geq 0$ ,  $A' = \frac{\eta[1 - c^{(1-q)}]}{q(c-1-\eta c)} < 0$ ,  $f^*$  is the global minimizer of  $R_{\mathcal{L}_q}(f)$ , and  $\hat{f}$  is the global minimizer of  $R_{\mathcal{L}_q}^\eta(f)$ .

*Proof.* Recall that for any softmax output  $f$ ,

$$R_{\mathcal{L}_q}(f) = \mathbb{E}_D[\mathcal{L}_q(f(\mathbf{x}), y_{\mathbf{x}})] = \mathbb{E}_{\mathbf{x}, y_{\mathbf{x}}}[\mathcal{L}_q(f(\mathbf{x}), y_{\mathbf{x}})],$$

and since for uniform noise with noise rate  $\eta$ ,  $\eta_{jk} = 1 - \eta$  for  $j = k$ , and  $\eta_{jk} = \frac{\eta}{c-1}$  for  $j \neq k$ , we have

$$\begin{aligned}
R_{\mathcal{L}_q}^\eta(f) &= \mathbb{E}_D[\mathcal{L}_q(f(\mathbf{x}), \tilde{y}_{\mathbf{x}})] = \mathbb{E}_{\mathbf{x}, \tilde{y}_{\mathbf{x}}}[\mathcal{L}_q(f(\mathbf{x}), \tilde{y}_{\mathbf{x}})] \\
&= \mathbb{E}_{\mathbf{x}} \mathbb{E}_{y_{\mathbf{x}}|\mathbf{x}} \mathbb{E}_{\tilde{y}_{\mathbf{x}}|y_{\mathbf{x}}, \mathbf{x}}[\mathcal{L}_q(f(\mathbf{x}), \tilde{y}_{\mathbf{x}})] \\
&= \mathbb{E}_{\mathbf{x}} \mathbb{E}_{y_{\mathbf{x}}|\mathbf{x}}[(1-\eta)\mathcal{L}_q(f(\mathbf{x}), y_{\mathbf{x}}) + \frac{\eta}{c-1} \sum_{i \neq y_{\mathbf{x}}} \mathcal{L}_q(f(\mathbf{x}), i)] \\
&= \mathbb{E}_{\mathbf{x}} \mathbb{E}_{y_{\mathbf{x}}|\mathbf{x}}[(1-\eta)\mathcal{L}_q(f(\mathbf{x}), y_{\mathbf{x}}) + \frac{\eta}{c-1} (\sum_{i=1}^c \mathcal{L}_q(f(\mathbf{x}), i) - \mathcal{L}_q(f(\mathbf{x}), y_{\mathbf{x}}))] \\
&= (1-\eta)R_{\mathcal{L}_q}(f) - \frac{\eta}{c-1} R_{\mathcal{L}_q}(f) + \frac{\eta}{c-1} \mathbb{E}_{\mathbf{x}} \mathbb{E}_{y_{\mathbf{x}}|\mathbf{x}}[\sum_{i=1}^c \mathcal{L}_q(f(\mathbf{x}), i)] \\
&= (1 - \frac{\eta c}{c-1}) R_{\mathcal{L}_q}(f) + \frac{\eta}{c-1} \mathbb{E}_{\mathbf{x}} \mathbb{E}_{y_{\mathbf{x}}|\mathbf{x}}[\sum_{i=1}^c \mathcal{L}_q(f(\mathbf{x}), i)]
\end{aligned}$$

Now, from Lemma 2, we have:

$$(1 - \frac{\eta c}{c-1}) R_{\mathcal{L}_q}(f) + \frac{\eta[c - c^{(1-q)}]}{q(c-1)} \leq R_{\mathcal{L}_q}^\eta(f) \leq (1 - \frac{\eta c}{c-1}) R_{\mathcal{L}_q}(f) + \frac{\eta}{q}.$$

We can also write the inequality in terms of  $R_{\mathcal{L}_q}(f)$ :

$$(R_{\mathcal{L}_q}^\eta(f) - \frac{\eta}{q}) / (1 - \frac{\eta c}{c-1}) \leq R_{\mathcal{L}_q}(f) \leq (R_{\mathcal{L}_q}^\eta(f) - \frac{\eta[c - c^{(1-q)}]}{q(c-1)}) / (1 - \frac{\eta c}{c-1})$$

Thus, for  $\hat{f}$ ,

$$R_{\mathcal{L}_q}^\eta(f^*) - R_{\mathcal{L}_q}^\eta(\hat{f}) \leq A + (1 - \frac{\eta c}{c-1})(R_{\mathcal{L}_q}(f^*) - R_{\mathcal{L}_q}(\hat{f})) \leq A,$$

or equivalently,

$$R_{\mathcal{L}_q}(f^*) - R_{\mathcal{L}_q}(\hat{f}) \geq A' + (R_{\mathcal{L}_q}^\eta(f^*) - R_{\mathcal{L}_q}^\eta(\hat{f})) / (1 - \frac{\eta c}{c-1}) \geq A'$$

where  $A = \frac{\eta[c^{(1-q)}-1]}{q(c-1)} \geq 0$  and  $A' = \frac{\eta[1-c^{(1-q)}]}{q(c-1-\eta c)}$ , since  $\eta \leq \frac{c-1}{c}$ , and  $f^*$  is a minimizer of  $R_{\mathcal{L}_q}(f)$ . Lastly, since  $\hat{f}$  is the minimizer of  $R_{\mathcal{L}_q}^\eta(f)$ , we have that  $R_{\mathcal{L}_q}^\eta(f^*) - R_{\mathcal{L}_q}^\eta(\hat{f}) \geq 0$ , or  $R_{\mathcal{L}_q}(f^*) - R_{\mathcal{L}_q}(\hat{f}) \leq 0$ . This completes the proof.  $\square$

**Remark.** Note that, when  $q = 1$ ,  $A = 0$ , and  $f^*$  is also minimizer of risk under uniform noise.

**Theorem 2.** Under class dependent noise when  $\eta_{ij} < (1 - \eta_i)$ ,  $\forall j \neq i$ ,  $\forall i, j \in [c]$ , where  $\eta_{ij} = p(\tilde{y} = j | y = i)$ ,  $\forall j \neq i$ , and  $(1 - \eta_i) = p(\tilde{y} = i | y = i)$ , if  $R_{\mathcal{L}_q}(f^*) = 0$ , then

$$0 \leq (R_{\mathcal{L}_q}^\eta(f^*) - R_{\mathcal{L}_q}^\eta(\hat{f})) \leq B, \quad (17)$$

where  $B = \frac{c^{1-q}-1}{q} \mathbb{E}_D(1 - \eta_{y_{\mathbf{x}}}) \geq 0$ ,  $f^*$  is the global minimizer of  $R_{\mathcal{L}_q}(f)$ , and  $\hat{f}$  is the global minimizer of  $R_{\mathcal{L}_q}^\eta(f)$ .

*Proof.* For class dependent noise, from Lemma 2, for any soft-max output function  $f$  we have

$$\begin{aligned}
R_{\mathcal{L}_q}^\eta(f) &= \mathbb{E}_D[(1 - \eta_{y_{\mathbf{x}}})\mathcal{L}_q(f(\mathbf{x}), y_{\mathbf{x}})] + \mathbb{E}_D[\sum_{i \neq y_{\mathbf{x}}} \eta_{y_{\mathbf{x}}i} \mathcal{L}_q(f(\mathbf{x}), i)] \\
&\leq \mathbb{E}_D[(1 - \eta_{y_{\mathbf{x}}})(\frac{c-1}{q} - \sum_{i \neq y_{\mathbf{x}}} \mathcal{L}_q(f(\mathbf{x}), i))] + \mathbb{E}_D[\sum_{i \neq y_{\mathbf{x}}} \eta_{y_{\mathbf{x}}i} \mathcal{L}_q(f(\mathbf{x}), i)] \\
&= \frac{c-1}{q} \mathbb{E}_D(1 - \eta_{y_{\mathbf{x}}}) - \mathbb{E}_D[\sum_{i \neq y_{\mathbf{x}}} (1 - \eta_{y_{\mathbf{x}}} - \eta_{y_{\mathbf{x}}i}) \mathcal{L}_q(f(\mathbf{x}), i)],
\end{aligned}$$

and

$$R_{\mathcal{L}_q}^\eta(f) \geq \frac{c - c^{1-q}}{q} \mathbb{E}_D(1 - \eta_{y_{\mathbf{x}}}) - \mathbb{E}_D\left[\sum_{i \neq y_{\mathbf{x}}} (1 - \eta_{y_{\mathbf{x}}} - \eta_{y_{\mathbf{x}}i}) \mathcal{L}_q(f(\mathbf{x}), i)\right].$$

Hence,

$$\begin{aligned} (R_{\mathcal{L}_q}^\eta(f^*) - R_{\mathcal{L}_q}^\eta(\hat{f})) &\leq \frac{c^{1-q} - 1}{q} \mathbb{E}_D(1 - \eta_{y_{\mathbf{x}}}) + \\ &\quad \mathbb{E}_D \sum_{i \neq y_{\mathbf{x}}} (1 - \eta_{y_{\mathbf{x}}} - \eta_{y_{\mathbf{x}}i}) [\mathcal{L}_q(\hat{f}(\mathbf{x}), i) - \mathcal{L}_q(f^*(\mathbf{x}), i)]. \end{aligned}$$

Now, from our assumption that  $R_{\mathcal{L}_q}(f^*) = 0$ , we have  $\mathcal{L}_q(f^*(\mathbf{x}), y_{\mathbf{x}}) = 0$ . This is only satisfied iff  $f_i^*(\mathbf{x}) = 1$  when  $i = y_{\mathbf{x}}$ , and  $f_i^*(\mathbf{x}) = 0$  if  $i \neq y_{\mathbf{x}}$ . Hence,  $\mathcal{L}_q(f^*(\mathbf{x}), i) = 1/q \forall i \neq y_{\mathbf{x}}$ . Moreover, by our assumption, we have  $(1 - \eta_{y_{\mathbf{x}}} - \eta_{y_{\mathbf{x}}i}) > 0$ . As a result, to derive an upper bound for the expression above, we need to maximize the second term. Note that by definition of the  $\mathcal{L}_q$  loss,  $\mathcal{L}_q(\hat{f}(\mathbf{x}), i) \leq 1/q \forall i \in [c]$ , and hence the second term is maximized iff  $\mathcal{L}_q(\hat{f}(\mathbf{x}), i) = 1/q \forall i \neq y_{\mathbf{x}}$ . This implies that the maximum of the second term is non-positive, so we have

$$(R_{\mathcal{L}_q}^\eta(f^*) - R_{\mathcal{L}_q}^\eta(\hat{f})) \leq \frac{c^{1-q} - 1}{q} \mathbb{E}_D(1 - \eta_{y_{\mathbf{x}}}).$$

Lastly, since  $\hat{f}$  is the minimizer of  $R_{\mathcal{L}_q}^\eta(f)$ , we have that  $R_{\mathcal{L}_q}^\eta(f^*) - R_{\mathcal{L}_q}^\eta(\hat{f}) \geq 0$ . This completes the proof.  $\square$

**Lemma 3.** For any  $\mathbf{x}$  and  $q \in (0, 1)$ , assuming  $1/c \leq k < 1$  where  $c$  represents the number of classes, the sum of truncated  $\mathcal{L}_q$  loss with respect to all classes is bounded by:

$$\tilde{d}k\mathcal{L}_q\left(\frac{1}{d}\right) + (c - \tilde{d})\mathcal{L}_q(k) \leq \sum_{j=1}^c \mathcal{L}_{\text{trunc}}(f(\mathbf{x}), \mathbf{e}_j) \leq c\mathcal{L}_q(k), \quad (18)$$

where  $\tilde{d} = \max(1, \frac{(1-q)^{1/q}}{k})$ .

*Proof.* For the upper bound, by definition of truncated  $\mathcal{L}_q$ ,  $\mathcal{L}_{\text{trunc}}(f(\mathbf{x}), \mathbf{e}_j) \leq \mathcal{L}_q(k)$  for any  $\mathbf{x}$  and  $j$ . Hence,  $\sum_{j=1}^c \mathcal{L}_{\text{trunc}}(f(\mathbf{x}), \mathbf{e}_j) \leq c\mathcal{L}_q(k)$ .

For the lower bound, it can be verified that,

$$\sum_{j=1}^c \mathcal{L}_{\text{trunc}}(\tilde{f}(\mathbf{x}), \mathbf{e}_j) \leq \sum_{j=1}^c \mathcal{L}_{\text{trunc}}(f(\mathbf{x}), \mathbf{e}_j)$$

where  $\tilde{f}(\mathbf{x}) = (p, \dots, p, 0, \dots, 0)$ , with  $p = 1/d \geq k$  and  $d$  is the number of elements in  $f(\mathbf{x})$  with a value  $\leq k$ . Note that since  $p > k$ ,  $1 \leq d \leq 1/k$ :

$$\sum_{j=1}^c \mathcal{L}_{\text{trunc}}(\tilde{f}(\mathbf{x}), \mathbf{e}_j) = d\mathcal{L}_q(p) + (c - d)\mathcal{L}_q(k) = d\mathcal{L}_q\left(\frac{1}{d}\right) + (c - d)\mathcal{L}_q(k).$$

We can get a universal lower bound (that does not depend on  $f$ ) by minimizing the above function with respect to  $d$ . To do so, we treat  $d$  to be continuous. By definition of  $\mathcal{L}_q$  loss, and recall that  $0 < q < 1$ ,

$$\min_{d \in [1, 1/k]} d\mathcal{L}_q\left(\frac{1}{d}\right) + (c - d)\mathcal{L}_q(k) = \min_{d \in [1, 1/k]} d[(1 - (\frac{1}{d})^q)/q - (1 - k^q)/q] = \min_{d \in [1, 1/k]} d[(k^q - (\frac{1}{d})^q)].$$

We can verify using the second derivative test that the above objective function is convex. As a result, we can find the minimum by taking its derivative. Doing so, we find that  $d = \frac{(1-q)^{1/q}}{k}$  minimizes the above objective function. Hence, the lower bound is

$$\tilde{d}k\mathcal{L}_q\left(\frac{1}{d}\right) + (c - \tilde{d})\mathcal{L}_q(k) \leq \sum_{j=1}^c \mathcal{L}_{\text{trunc}}(f(\mathbf{x}), \mathbf{e}_j),$$

where  $\tilde{d} = \max(1, \frac{(1-q)^{1/q}}{k})$ .  $\square$

**Remark.** Using Lemma 3, we can prove that the proposed truncated loss leads to more noise robust training following the same arguments as in Theorem 1 and 2.
